# Supplementary figures and images for: Modeling T Cell Antigen Discrimination Based on Feedback Control of Digital ERK Responses
Source: PLOS journal article supplement (doi:10.1371/journal.pbio.0030356), 2005-10-18

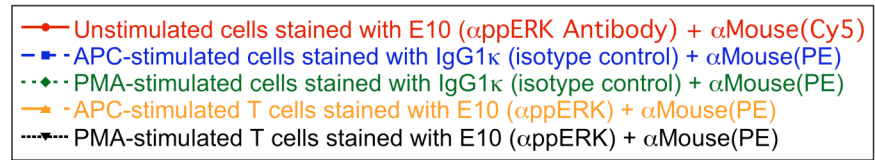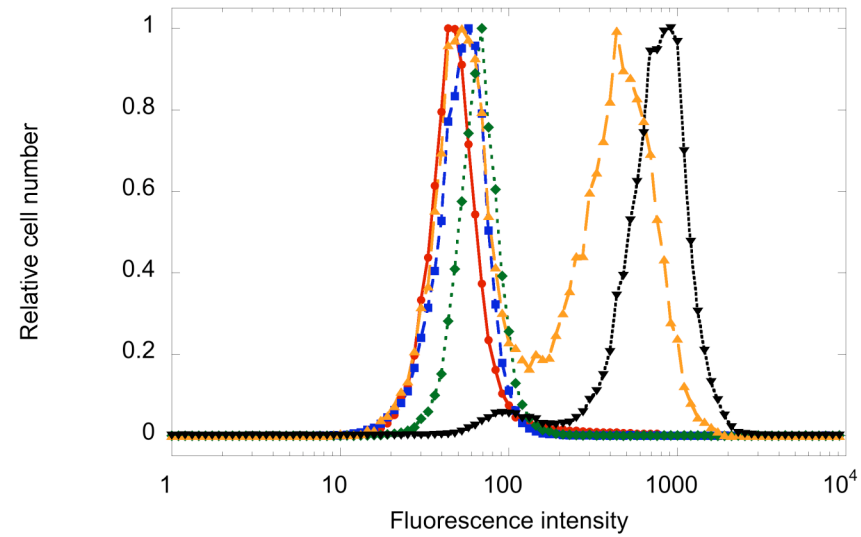

Supplement: S2 (10.1371/journal.pbio.0030356.s002) [file journal.pbio.0030356.s002]
